# Supplementary material for: Tracing the history and ecological context of Wolbachia double infection in a specialist host (Urophora cardui)—parasitoid (Eurytoma serratulae) system
Source: PubMed Central journal article supplement (PMC5288247; doi:10.1002/ece3.2713), 2017-01-17
Supplement: ECE3-7-986-s003.pdf [file ECE3-7-986-s003.pdf]

## Appendix S3.

### Johannesen, J.: Tracing the history and ecological context of *Wolbachia* double infection in a specialist host (*Urophora cardui*) – parasitoid (*Eurytoma serratulae*) system

Blastn search for the Wolbachia Eser\_A strain on a contig SOAPdeNovo (kmer=63) genome assembly of *Urophora cardui* generated from Illumina Miseq reads.

Query = Wolbachia strain from *Eurytoma serratulae*, Eser\_A  
Subject = contig retrieved from assembly.

The subject contigs are colour coded for sequences corresponding to strain

Subject **Yellow = E. serratulae strain** (U. cardui excluded)

Subject **Green = U. cardui strain**(E. serratulae excluded)

Subject **Gray = other sequence**

Subject **Blue = not discernible between U. cardui and E. serratulae strains**

BLASTN 2.2.30+

Reference: Zheng Zhang, Scott Schwartz, Lukas Wagner, and Webb Miller (2000), "A greedy algorithm for aligning DNA sequences", J Comput Biol 2000; 7(1-2):203-14.

Database: 120L\_kmer63.contig  
11,496,826 sequences; 1,346,736,270 total letters

## Query= fbpA\_Wolbachia\_Host\_E.serratulae

Length=429

| Sequences producing significant alignments: | Score<br>(Bits) | E<br>Value |
|---------------------------------------------|-----------------|------------|
| 22763017 length 706 cvg_33.5_tip_0          | 793             | 0.0        |
| 22022860 length 281 cvg_60.9_tip_0          | 399             | 2e-109     |
| 21643576 length 235 cvg_1.0_tip_0           | 250             | 2e-64      |
| 17623531 length 127 cvg_2.0_tip_0           | 180             | 2e-43      |
| 18086659 length 127 cvg_2.0_tip_0           | 178             | 8e-43      |
| 20753312 length 191 cvg_1.0_tip_1           | 165             | 6e-39      |
| 19628033 length 148 cvg_63.0_tip_0          | 154             | 1e-35      |
| 14504053 length 98 cvg_63.0_tip_0           | 143             | 3e-32      |
| 13905850 length 92 cvg_63.0_tip_0           | 143             | 3e-32      |
| 13865782 length 92 cvg_63.0_tip_0           | 135             | 5e-30      |

> 22763017 length 706 cvg\_33.5\_tip\_0  
Length=706

Score = 793 bits (429), Expect = 0.0  
Identities = 429/429 (100%), Gaps = 0/429 (0%)  
Strand=Plus/Minus

```
Query 1 GCTGGAATGCTCCCACCTTATTTTGAAACTTAATAGTTCCAACCTCTTTACATTCAAAGGAT 60
      |||
Sbjct 578 GCTGGAATGCTCCCACCTTATTTTGAAACTTAATAGTTCCAACCTCTTTACATTCAAAGGAT 519

Query 61 CTAACCTCTGATCAGGCAATAACCTCTTCTGTGAAAGATGCGCTGCGTTTGGGATGCTTA 120
      |||
Sbjct 518 CTAACCTCTGATCAGGCAATAACCTCTTCTGTGAAAGATGCGCTGCGTTTGGGATGCTTA 459

Query 121 GCTGTCCGATTTACTATATATCCTGGTTCTGCTAAGTGTTCGATATGATGGAGGAAGCC 180
      |||
Sbjct 458 GCTGTCCGATTTACTATATATCCTGGTTCTGCTAAGTGTTCGATATGATGGAGGAAGCC 399

Query 181 CGTGAATCATAGCTGAAGCCAAATCTTATGGACTTGCAGTAGTGCTATGGTCTTATCCA 240
      |||
Sbjct 398 CGTGAATCATAGCTGAAGCCAAATCTTATGGACTTGCAGTAGTGCTATGGTCTTATCCA 339

Query 241 CGCGGTGAAGGGATTTCCAAAGAAGGTGAAACAGCAGTTGATGTTATTGCCTATGCTGCG 300
      |||
Sbjct 338 CGCGGTGAAGGGATTTCCAAAGAAGGTGAAACAGCAGTTGATGTTATTGCCTATGCTGCG 279

Query 301 CACATGGCAGCTTTGCTTGGCGCTAATATAATAAAAGTAAAACCTCCAACCTAAATATTTG 360
      |||
Sbjct 278 CACATGGCAGCTTTGCTTGGCGCTAATATAATAAAAGTAAAACCTCCAACCTAAATATTTG 219

Query 361 GAAAGGGAGAAAATAGAAACAGAAAATATTGAATCATTATCTAAAAGAATTGAATATGTT 420
      |||
Sbjct 218 GAAAGGGAGAAAATAGAAACAGAAAATATTGAATCATTATCTAAAAGAATTGAATATGTT 159

Query 421 AAAAGGTCT 429
      |||
Sbjct 158 AAAAGGTCT 150
```

> 22022860 length 281 cvg\_60.9\_tip\_0  
Length=281

Score = 399 bits (216), Expect = 2e-109  
Identities = 250/267 (94%), Gaps = 0/267 (0%)  
Strand=Plus/Minus

```
Query 158 GTTTCGATATGATGGAGGAAGCCCCTGGAATCATAGCTGAAGCCAAATCTTATGGACTTG 217
      |||
Sbjct 281 GTTTGATATGATGGAGAAGCCCCTGAAATCTAGCTGAAGCCAAATCTTATGGCCTTG 222

Query 218 CAGTAGTGCTATGGTCTTATCCACGCGGTGAAGGGATTTCCAAAGAAGGTGAAACAGCAG 277
      |||
Sbjct 221 CAGTAGTGCTATGGTCTTATCCACGTGGTGAAGGAATTTCCAAAGAAGGTGAAACAGCAG 162

Query 278 TTGATGTTATTGCCTATGCTGCGCACATGGCAGCTTTGCTTGGCGCTAATATAATAAAAG 337
      |||
Sbjct 161 TTGATGTTATTGCCTATGCTGCGCACATAGCAGCTTTACTTGGCGCTAATATAATCAAAG 102

Query 338 TAAAACCTCCAACCTAAATATTTGGAAAGGGAGAAAATAGAAACAGAAAATATTGAATCAT 397
      |||
Sbjct 101 TAAAGCTTCCAACCTAATATTTGGAAAAGAAAGATAGAAACAGAAAATATTGAATCAT 42
```

Query 398 TATCTAAAAGAATTGAATATGTTAAAA 424  
|||||  
Sbjct 41 TATCTAAAAGAATTGAATATATTTAAAA 15

> 21643576 length 235 cvg\_1.0\_tip\_0  
Length=235

Score = 250 bits (135), Expect = 2e-64  
Identities = 171/189 (90%), Gaps = 0/189 (0%)  
Strand=Plus/Minus

Query 1 GCTGGAATGCTCCCACTTATTTTGAACCTTAATAGTTCCAACCTCTTTACATTCAAAGGAT 60  
|||||  
Sbjct 191 GCTGGAATGCTCCCACTTACTTTTGAACATAATAGTTCCAACCTCTTTACATTCAAATAAT 132  
Query 61 CTAACCTCTGATCAGGCAATAACCTCTTCTGTGAAAGATGCGCTGCGTTTGGGATGCTTA 120  
|| |  
Sbjct 131 CTGGCTTCTGATCAAGCAATAACCTCTTCTGTGAAAGAAGCACTGCGTTTGGGCTGCTTG 72  
Query 121 GCTGTCCGATTTACTATATATCCTGGTTCTGCTAAGTGTTCGATATGATGGAGGAAGCC 180  
|||||  
Sbjct 71 GCTGTGTTTACTATATATCCTGGTTCTGCTAAGTGTTCGATATGATGGAGGAAGCC 12  
Query 181 CGTGGAATC 189  
||||  
Sbjct 11 CGTGAATC 3

> 17623531 length 127 cvg\_2.0\_tip\_0  
Length=127

Score = 180 bits (97), Expect = 2e-43  
Identities = 117/127 (92%), Gaps = 0/127 (0%)  
Strand=Plus/Plus

Query 94 AAAGATGCGCTGCGTTTGGGATGCTTAGCTGTCCGATTTACTATATATCCTGGTTCTGCT 153  
|||||  
Sbjct 1 AAAGATGCACTGCGTTTGGGCTGCTTGGCTGTGGATTTACTATATATCCTGGTTCTGCT 60  
Query 154 AAGTGTTCGATATGATGGAGGAAGCCCCTGGAATCATAGCTGAAGCCAAATCTTATGGA 213  
|| |  
Sbjct 61 AAGCGTTTGGATATGATGGAAGAAGCCCCTGGAATCATAGCTGAAGCCAAATCTTATGGC 120  
Query 214 CTTGCAG 220  
|||||  
Sbjct 121 CTTGCAG 127

> 18086659 length 127 cvg\_2.0\_tip\_0  
Length=127

Score = 178 bits (96), Expect = 8e-43  
Identities = 116/126 (92%), Gaps = 0/126 (0%)  
Strand=Plus/Plus

Query 59 ATCTAACCTCTGATCAGGCAATAACCTCTTCTGTGAAAGATGCGCTGCGTTTGGGATGCT 118  
|||||  
Sbjct 1 ATCTGACTTCTGATCAAGCAATAACCTCTTCTGTGAAAGATGCACTGCGTTTGGGCTGCT 60  
Query 119 TAGCTGTCCGATTTACTATATATCCTGGTTCTGCTAAGTGTTCGATATGATGGAGGAAG 178  
| | |  
Sbjct 61 TCGTTGTTGGATTTACTATATATCCTGGTTCTGCTAAGTGTTCGATATGATGGAGGAAG 120

Query 179 CCCGTG 184  
|||||  
Sbjct 121 CCCGTG 126

> 20753312 length 191 cvg\_1.0\_tip\_1  
Length=191

Score = 165 bits (89), Expect = 6e-39  
Identities = 105/113 (93%), Gaps = 0/113 (0%)  
Strand=Plus/Minus

Query 1 GCTGGAATGCTCCCACTTATTTTGAACCTTAATAGTTCCAACCTCTTTACATTCAAAGGAT 60  
|||||  
Sbjct 113 GCTGGAATGCTCCCACTTATTTTGAACCTTAATAGTTCCAACCTCCTTACCTTCAAATAAT 54

Query 61 CTAACCTCTGATCAGGCAATAACCTCTTCTGTGAAAGATGCGCTGCGTTTGGG 113  
|| || ||  
Sbjct 53 CTCACTTCTGATCAAGCAATAACCTCTTCTGTGAAAGATGCACTGCGTTTGGG 1

> 19628033 length 148 cvg\_63.0\_tip\_0  
Length=148

Score = 154 bits (83), Expect = 1e-35  
Identities = 95/101 (94%), Gaps = 0/101 (0%)  
Strand=Plus/Plus

Query 1 GCTGGAATGCTCCCACTTATTTTGAACCTTAATAGTTCCAACCTCTTTACATTCAAAGGAT 60  
|||||  
Sbjct 45 GCTGGAATGCTCCCACTTATTTTGAACCTTAATAGTTCCAACCTCCTTACATTCAAAAAAT 104

Query 61 CTAACCTCTGATCAGGCAATAACCTCTTCTGTGAAAGATGC 101  
|| || ||  
Sbjct 105 CTGACTTCTGATCAAGCAATAACCTCTTCTGTGAAAGATGC 145

> 14504053 length 98 cvg\_63.0\_tip\_0  
Length=98

Score = 143 bits (77), Expect = 3e-32  
Identities = 91/98 (93%), Gaps = 0/98 (0%)  
Strand=Plus/Plus

Query 59 ATCTAACCTCTGATCAGGCAATAACCTCTTCTGTGAAAGATGCGCTGCGTTTGGGATGCT 118  
|||| ||  
Sbjct 1 ATCTGACTTCTGATCAAGCAATAACCTCTTCTGTGAAAGATGCACTGCGTTTGGGCTGCT 60

Query 119 TAGCTGTTCGGATTTACTATATATCCTGGTTCTGCTAAG 156  
| |||||  
Sbjct 61 TGGCTGTTGGATTTACTATATATCCTGGTTCTGCTAAG 98

> 13905850 length 92 cvg\_63.0\_tip\_0  
Length=92

Score = 143 bits (77), Expect = 3e-32  
Identities = 87/92 (95%), Gaps = 0/92 (0%)  
Strand=Plus/Plus

Query 129 ATTTACTATATATCCTGGTTCTGCTAAGTGTTCGATATGATGGAGGAAGCCCGTGAAT 188  
|||||

```

Sbjct 1      ATTTACTATATATCCTGGTTCTGCTAAGTGTTTTGATATGATGGAAGAAGCCCGTGAAAT 60
Query 189     CATAGCTGAAGCCAAATCTTATGGACTTGCGAG 220
          | |||||
Sbjct 61     CGTAGCTGAAGCCAAATCTTATGGGCTTGCGAG 92

```

```

> 13865782 length 92 cvg_63.0_tip_0
Length=92

```

```

Score = 135 bits (73), Expect = 5e-30
Identities = 85/91 (93%), Gaps = 0/91 (0%)
Strand=Plus/Plus

```

```

Query 94      AAAGATGCGCTGCGTTTGGGATGCTTAGCTGTCCGATTTACTATATATCCTGGTTCTGCT 153
          |||
Sbjct 1      AAAGATGCACTGCGTTTGGGCTGCTTGGCTGTTGGATTTACTATATATCCTGGTTCTGCT 60

```

```

Query 154     AAGTGTTTTGATATGATGGAGGAAGCCCGTG 184
          |||
Sbjct 61     AAGTGTTTTGATATGATGGAAGAAGCCCGTG 91

```

```

Lambda      K      H
1.33      0.621  1.12

```

```

Gapped
Lambda      K      H
1.28      0.460  0.850

```

Effective search space used: 410954881942

## Query= hcpA\_Wolbachia\_Host\_E.serratulae

Length=444

| Sequences producing significant alignments: | Score (Bits) | E Value |
|---------------------------------------------|--------------|---------|
| 22057630 length 287 cvg_1.0_tip_1           | 473          | 1e-131  |
| 21830227 length 253 cvg_1.0_tip_1           | 446          | 2e-123  |
| 20976622 length 199 cvg_36.7_tip_0          | 368          | 5e-100  |
| 21427278 length 220 cvg_1.0_tip_1           | 340          | 1e-91   |
| 20709012 length 190 cvg_1.0_tip_0           | 327          | 8e-88   |
| 22043540 length 285 cvg_1.0_tip_1           | 263          | 2e-68   |
| 21081276 length 203 cvg_1.0_tip_1           | 255          | 4e-66   |
| 16987487 length 124 cvg_37.0_tip_0          | 230          | 2e-58   |
| 19075283 length 132 cvg_60.3_tip_0          | 228          | 8e-58   |
| 19569559 length 146 cvg_63.0_tip_0          | 226          | 3e-57   |
| 15521461 length 111 cvg_33.4_tip_0          | 206          | 4e-51   |
| 15424818 length 110 cvg_63.0_tip_0          | 204          | 1e-50   |
| 14894712 length 103 cvg_60.8_tip_0          | 180          | 2e-43   |
| 14221445 length 95 cvg_61.5_tip_0           | 176          | 3e-42   |
| 16301770 length 119 cvg_63.0_tip_0          | 172          | 4e-41   |
| 14962368 length 103 cvg_63.0_tip_0          | 163          | 2e-38   |
| 13234477 length 87 cvg_61.3_tip_0           | 161          | 9e-38   |
| 11246909 length 76 cvg_63.0_tip_0           | 134          | 2e-29   |
| 10545799 length 73 cvg_42.0_tip_0           | 122          | 4e-26   |
| 21173064 length 207 cvg_58.8_tip_0          | 117          | 2e-24   |

21996609 length 277 cvg\_1.0\_tip\_1

115 7e-24

> 22057630 length 287 cvg\_1.0\_tip\_1  
Length=287

Score = 473 bits (256), Expect = 1e-131  
Identities = 276/286 (97%), Gaps = 0/286 (0%)  
Strand=Plus/Plus

```

Query 5 CCGAACTCAACCCGCGCCTTCGCTCTGCTATATTTGCTGCACGCAAGGAAAATCTACCAA 64
      |||
Sbjct 1 CCGAACTCAACCCGCGCCTTCGCTCTGCTATATTTTCTGCACGCAAGGAAAATCTACCAA 60

Query 65 AAGATAAAATAGAAACAGCAATAAAAAATGCAACTGGTAACGTTGCTGGAGAAAATTACG 124
      |||
Sbjct 61 AAGATAAAATAGAAACAGCAATAAAAAATGCAACTGGCAACGTTGCTGGAGAAAATTATG 120

Query 125 AGGAAATACAATATGAAGGTCATGGGCCTTCTGGCACTGCACTCATTGTCCATGCCTTGA 184
      |||
Sbjct 121 AGGAAATCCAATATGAAGGTCATGGGCCTTCTGTCACTGCACTTATTGTCCATGCCTTGA 180

Query 185 CTAATAACCGCAACCGTACTGCTTCTGAGGTACGTTATATATTTTCTCGCAAGGGTGGAA 244
      |||
Sbjct 181 CTAATAACCGCAACCGTACTGCGTCTGGGGTACGTTATATATTTGTCTCGCAAGGGTGGAA 240

Query 245 ACTTGGGAGAAACAGGAAGTGTTAGTTACCTTTTTGATCATGTAGG 290
      |||
Sbjct 241 ACTTGGGAGAAACAGGAAGTGTTAGTTACCTTTTTCGATCATGTAGG 286

```

> 21830227 length 253 cvg\_1.0\_tip\_1  
Length=253

Score = 446 bits (241), Expect = 2e-123  
Identities = 249/253 (98%), Gaps = 0/253 (0%)  
Strand=Plus/Plus

```

Query 36 ATTTGCTGCACGCAAGGAAAATCTACCAAAGATAAAATAGAAACAGCAATAAAAAATGC 95
      |||
Sbjct 1 ATTTGCTGCACGCAAGGAAAATCTACCAAAGATAAAATAGAAACAGCAATAAAAAATGC 60

Query 96 AACTGGTAACGTTGCTGGAGAAAATTACGAGGAAATACAATATGAAGGTCATGGGCCTTC 155
      |||
Sbjct 61 AACGGGTAACGTTGCTGGAGAAAATTACGAGGAAATACAATATGAAGGTCATGGGCCCTC 120

Query 156 TGGCACTGCACTCATTGTCCATGCCTTGACTAATAACCGCAACCGTACTGCTTCTGAGGT 215
      |||
Sbjct 121 TGGCACTGCACTCATTGTCCATGCCTTGACTAATAACCGCAATCGTACTGCTTCTGAGGT 180

Query 216 ACGTTATATATTTTCTCGCAAGGGTGGAAACTTGGGAGAAACAGGAAGTGTTAGTTACCT 275
      |||
Sbjct 181 ACGTTATATATTTTCTCGTAAGGGTGGAAACTTGGGAGAAACAGGAAGTGTTAGTTACCT 240

Query 276 TTTTGATCATGTA 288
      |||
Sbjct 241 TTTTGATCATGTA 253

```

> 20976622 length 199 cvg\_36.7\_tip\_0  
Length=199

Score = 368 bits (199), Expect = 5e-100

Identities = 199/199 (100%), Gaps = 0/199 (0%)  
Strand=Plus/Minus

```
Query 216 ACGTTATATATTTTCTCGCAAGGGTGGAAACTTGGGAGAAACAGGAAGTGTAGTTACCT 275
          |||
Sbjct 199 ACGTTATATATTTTCTCGCAAGGGTGGAAACTTGGGAGAAACAGGAAGTGTAGTTACCT 140

Query 276 TTTTGATCATGTAGGTTTAATTGTCTATAAAGCAGAGGGTGTGAATTTTGATGATTTATT 335
          |||
Sbjct 139 TTTTGATCATGTAGGTTTAATTGTCTATAAAGCAGAGGGTGTGAATTTTGATGATTTATT 80

Query 336 CAGTCATGGAATCGAATTAGAAGTATTGAATGTTGAGGAAAATGACAAAGAAGGATTACA 395
          |||
Sbjct 79 CAGTCATGGAATCGAATTAGAAGTATTGAATGTTGAGGAAAATGACAAAGAAGGATTACA 20

Query 396 CGTTATAACTTGTGAAATA 414
          |||
Sbjct 19 CGTTATAACTTGTGAAATA 1
```

> 21427278 length 220 cvg\_1.0\_tip\_1  
Length=220

Score = 340 bits (184), Expect = 1e-91  
Identities = 208/220 (95%), Gaps = 0/220 (0%)  
Strand=Plus/Plus

```
Query 155 CTGGCACTGCACTCATTGTCCATGCCTTGACTAATAACCGCAACCGTACTGCTTCTGAGG 214
          |||
Sbjct 1 CTGGCACTGCACTTATTGTCCATGCCTTGACTAATAACCGCAACCGTACTGCTCCTGAGG 60

Query 215 TACGTTATATATTTTCTCGCAAGGGTGGAAACTTGGGAGAAACAGGAAGTGTAGTTACC 274
          |||
Sbjct 61 TACGTTATATATTTTCTCGCAAGGGTGGAAACTTGGGAGAAACAGGAAGTGTAGTTACC 120

Query 275 TTTTGTGATCATGTAGGTTTAATTGTCTATAAAGCAGAGGGTGTGAATTTTGATGATTTAT 334
          |||
Sbjct 121 TTTTGTGATCATGTAGGCTTAATCGTCTATAAAGCAGTGGGTGTGAATTTTGATGATTTAT 180

Query 335 TCAGTCATGGAATCGAATTAGAAGTATTGAATGTTGAGGA 374
          |||
Sbjct 181 TTAATTATGGGATCGAGTTAGAAGTATTGAATGTTGAGGA 220
```

> 20709012 length 190 cvg\_1.0\_tip\_0  
Length=190

Score = 327 bits (177), Expect = 8e-88  
Identities = 181/183 (99%), Gaps = 0/183 (0%)  
Strand=Plus/Minus

```
Query 1 CTACCCGAAGTCAACCCGCGCCTTCGCTCTGCTATATTTGCTGCACGCAAGGAAAATCTA 60
          |||
Sbjct 183 CTACCCGAAGTCAACCCGCGCCTTCGCTCTGCTATATTTGCTGCACGCAAGGAAAATACTA 124

Query 61 CCAAAAGATAAAAATAGAAACAGCAATAAAAAATGCAACTGGTAACGTTGCTGGAGAAAAT 120
          |||
Sbjct 123 CCAAAAGATAAAAATAGAAACAGCAATAAAAAATGCAACTGGTAACGTTGCTGGAGAAAAA 64

Query 121 TACGAGGAAATACAATATGAAGGTCATGGGCCTTCTGGCACTGCACTCATTGTCCATGCC 180
          |||
Sbjct 63 TACGAGGAAATACAATATGAAGGTCATGGGCCTTCTGGCACTGCACTCATTGTCCATGCC 4
```

Query 181 TTG 183  
|||  
Sbjct 3 TTG 1

> 22043540 length 285 cvg\_1.0\_tip\_1  
Length=285

Score = 263 bits (142), Expect = 2e-68  
Identities = 148/151 (98%), Gaps = 0/151 (0%)  
Strand=Plus/Plus

Query 294 AATTGTCTATAAAGCAGAGGGTGTGAATTTTGGATGATTTATTCAGTCATGGAATCGAATT 353  
|||||  
Sbjct 1 AATTGTCTATAAAGCAGAGGGTGTGAATTTTGGATGATTTATTCAGTCATGGAATCGAATT 60

Query 354 AGAAGTATTGAATGTTGAGGAAAATGACAAAGAAGGATTACACGTTATAACTTGTGAAAT 413  
|| |||||  
Sbjct 61 AGCAGTATTGAATGTTGAGGAAAATGACAAAGAAGGTTTACACGTTATACTTGTGAAAT 120

Query 414 AAAAGATTTTGGTAAAGTACGCGATGCCTTT 444  
|||||  
Sbjct 121 AAAAGATTTTGGTAAAGTACGCGATGCCTTT 151

> 21081276 length 203 cvg\_1.0\_tip\_1  
Length=203

Score = 255 bits (138), Expect = 4e-66  
Identities = 152/159 (96%), Gaps = 0/159 (0%)  
Strand=Plus/Minus

Query 4 CCCGAACTCAACCCGCGCCTTCGCTCTGCTATATTTGCTGCACGCAAGGAAAATCTACCA 63  
||| |||||  
Sbjct 159 CCCAAACTCAACCCGCGCCTTCGCTCTGCTATATTTGCAGCACGCAAGGAAAATCTACCA 100

Query 64 AAAGATAAAATAGAAACAGCAATAAAAAATGCAACTGGTAACGTTGCTGGAGAAAATTAC 123  
| ||| |||||  
Sbjct 99 AGAGAAAAATAGAAACAGCAATAAAAAATGCAACGGGTAACGTTGCTGGAGAAAATTAT 40

Query 124 GAGGAAATACAATATGAAGGTCATGGGCCTTCTGGCACT 162  
||||| |||||  
Sbjct 39 GAGGAAATCCAATATGAAGGTCATGGGCCTTCTGGCACT 1

> 16987487 length 124 cvg\_37.0\_tip\_0  
Length=124

Score = 230 bits (124), Expect = 2e-58  
Identities = 124/124 (100%), Gaps = 0/124 (0%)  
Strand=Plus/Plus

Query 60 ACCAAAAGATAAAATAGAAACAGCAATAAAAAATGCAACTGGTAACGTTGCTGGAGAAAA 119  
|||||  
Sbjct 1 ACCAAAAGATAAAATAGAAACAGCAATAAAAAATGCAACTGGTAACGTTGCTGGAGAAAA 60

Query 120 TTACGAGGAAATACAATATGAAGGTCATGGGCCTTCTGGCACTGCACTCATTGTCCATGC 179  
|||||  
Sbjct 61 TTACGAGGAAATACAATATGAAGGTCATGGGCCTTCTGGCACTGCACTCATTGTCCATGC 120

Query 180 CTTG 183  
|||  
Sbjct 121 CTTG 124





Strand=Plus/Minus

```
Query 169 ATTGTCCATGCCTTGACTAATAACCGCAACCGTACTGCTTCTGAGGTACGTTATATATTT 228
          |||
Sbjct 110 ATTGTCCATGCCTTGACTAATAACCGCAACCGTACTGCTTCTGAGGTACGTTATATATTT 51

Query 229 TCTCGCAAGGGTGGAAACTTGGGAGAAACAGGAAGTGTTAGTTACCTTTT 278
          |||
Sbjct 50 TCTCGCAAGGGTGGAAACTTGGGAGAAACAGGAAGTGTTAGTTACCTTTT 1
```

> 14894712 length 103 cvg\_60.8\_tip\_0  
Length=103

Score = 180 bits (97), Expect = 2e-43  
Identities = 101/103 (98%), Gaps = 0/103 (0%)  
Strand=Plus/Plus

```
Query 60 ACCAAAAGATAAAAATAGAAACAGCAATAAAAAATGCAACTGGTAACGTTGCTGGAGAAAA 119
          |||
Sbjct 1 ACCAAAAGATAAAAATAGAAACAGCAATAAAAAATGCAACTGGTAACGTTGCTGGAGAAAA 60

Query 120 TTACGAGGAAATACAATATGAAGGTCATGGGCCTTCTGGCACT 162
          |||
Sbjct 61 TTATGAGGAAATCCAATATGAAGGTCATGGGCCTTCTGGCACT 103
```

> 14221445 length 95 cvg\_61.5\_tip\_0  
Length=95

Score = 176 bits (95), Expect = 3e-42  
Identities = 95/95 (100%), Gaps = 0/95 (0%)  
Strand=Plus/Minus

```
Query 4 CCCGAACTCAACCCGCGCCTTCGCTCTGCTATATTTGCTGCACGCAAGGAAAATCTACCA 63
          |||
Sbjct 95 CCCGAACTCAACCCGCGCCTTCGCTCTGCTATATTTGCTGCACGCAAGGAAAATCTACCA 36

Query 64 AAAGATAAAAATAGAAACAGCAATAAAAAATGCAAC 98
          |||
Sbjct 35 AAAGATAAAAATAGAAACAGCAATAAAAAATGCAAC 1
```

> 16301770 length 119 cvg\_63.0\_tip\_0  
Length=119

Score = 172 bits (93), Expect = 4e-41  
Identities = 93/93 (100%), Gaps = 0/93 (0%)  
Strand=Plus/Minus

```
Query 352 TTAGAAGTATTGAATGTTGAGGAAAATGACAAAGAAGGATTACACGTTATAACTTGTGAA 411
          |||
Sbjct 119 TTAGAAGTATTGAATGTTGAGGAAAATGACAAAGAAGGATTACACGTTATAACTTGTGAA 60

Query 412 ATAAAAGATTTTGGTAAAGTACGCGATGCCTTT 444
          |||
Sbjct 59 ATAAAAGATTTTGGTAAAGTACGCGATGCCTTT 27
```

> 14962368 length 103 cvg\_63.0\_tip\_0  
Length=103

Score = 163 bits (88), Expect = 2e-38



Score = 117 bits (63), Expect = 2e-24  
 Identities = 63/63 (100%), Gaps = 0/63 (0%)  
 Strand=Plus/Minus

Query 4 CCCGAACTCAACCCGCGCCTTCGCTCTGCTATATTTGCTGCACGCAAGGAAAATCTACCA 63  
 |||  
 Sbjct 63 CCCGAACTCAACCCGCGCCTTCGCTCTGCTATATTTGCTGCACGCAAGGAAAATCTACCA 4

Query 64 AAA 66  
 |||  
 Sbjct 3 AAA 1

> 21996609 length 277 cvg\_1.0\_tip\_1  
 Length=277

Score = 115 bits (62), Expect = 7e-24  
 Identities = 62/62 (100%), Gaps = 0/62 (0%)  
 Strand=Plus/Plus

Query 84 AATAAAAAATGCAACTGGTAACGTTGCTGGAGAAAATTACGAGGAAATACAATATGAAGG 143  
 |||  
 Sbjct 216 AATAAAAAATGCAACTGGTAACGTTGCTGGAGAAAATTACGAGGAAATACAATATGAAGG 275

Query 144 TC 145  
 ||  
 Sbjct 276 TC 277

Lambda K H  
 1.33 0.621 1.12

Gapped  
 Lambda K H  
 1.28 0.460 0.850

Effective search space used: 426327259072

## Query= CoxA\_Wolbachia\_Host\_E.serratulae

Length=402

| Sequences producing significant alignments: | Score (Bits) | E Value |
|---------------------------------------------|--------------|---------|
| 21853093 length 256 cvg_1.0_tip_1           | 414          | 5e-114  |
| 20563934 length 184 cvg_38.1_tip_0          | 340          | 9e-92   |
| 21022630 length 201 cvg_1.0_tip_0           | 333          | 2e-89   |
| 22438024 length 412 cvg_32.5_tip_0          | 279          | 2e-73   |
| 21190622 length 208 cvg_1.0_tip_1           | 272          | 3e-71   |
| 20023104 length 162 cvg_62.7_tip_0          | 267          | 2e-69   |
| 18361237 length 127 cvg_2.0_tip_0           | 224          | 1e-56   |
| 14852056 length 102 cvg_61.1_tip_0          | 189          | 4e-46   |
| 14331621 length 96 cvg_63.0_tip_0           | 178          | 8e-43   |
| 15243986 length 107 cvg_63.0_tip_0          | 172          | 4e-41   |
| 14097458 length 94 cvg_63.0_tip_0           | 169          | 5e-40   |
| 13770563 length 91 cvg_63.0_tip_0           | 169          | 5e-40   |
| 14514057 length 98 cvg_63.0_tip_0           | 159          | 3e-37   |
| 13017009 length 85 cvg_63.0_tip_0           | 147          | 2e-33   |

18281483 length 127 cvg\_63.0\_tip\_0 141 1e-31  
17442278 length 126 cvg\_2.0\_tip\_0 134 2e-29

> 21853093 length 256 cvg\_1.0\_tip\_1  
Length=256

Score = 414 bits (224), Expect = 5e-114  
Identities = 236/242 (98%), Gaps = 0/242 (0%)  
Strand=Plus/Minus

```
Query 1 ATGCGCACAAAAGGAATGTCATTAAC TAAGATGCCACTGTTTGGTCTGTCTTGCTA 60
      |||
Sbjct 242 ATGCGCACAAAAGGAATGTCATTAAC TAAGATGCCACTGTTTGGTATGTCTTGCTA 183

Query 61 ACAGCATTTATGTTGATTGTTGCCTTACCAGTGCTTGCCGGTGCTATAACTATGCTTCTT 120
      |||
Sbjct 182 ACAGCATTTATGTTGATTGTTGCCTTACCAGTGCTTGCCGGTGCCATAACTATGCTTCTT 123

Query 121 ACTGATCGCAATATTGGTACTTCCTTTTTTGATCCTGCAGGTGGTGGTGACCCTGTGTTA 180
      |||
Sbjct 122 ACTGATCGCAATATTGGTACTTCCTTTTTTGATCCTGTAGGTGGTGGTGACCCCGTGTTA 63

Query 181 TTTCAACATTTATTTTGGTTTTTTGGTCATCCAGAAGTTTACGTAATTATTTTCTGCA 240
      |||
Sbjct 62 TTTCAACATATATTTTGGTTTTTTGGGCATCCAGAAGTTTACGTAATTATTTTCTGCA 3

Query 241 TT 242
      ||
Sbjct 2 TT 1
```

> 20563934 length 184 cvg\_38.1\_tip\_0  
Length=184

Score = 340 bits (184), Expect = 9e-92  
Identities = 184/184 (100%), Gaps = 0/184 (0%)  
Strand=Plus/Minus

```
Query 70 ATGTTGATTGTTGCCTTACCAGTGCTTGCCGGTGCTATAACTATGCTTCTTACTGATCGC 129
      |||
Sbjct 184 ATGTTGATTGTTGCCTTACCAGTGCTTGCCGGTGCTATAACTATGCTTCTTACTGATCGC 125

Query 130 AATATTGGTACTTCCTTTTTTGATCCTGCAGGTGGTGGTGACCCTGTGTTATTTCAACAT 189
      |||
Sbjct 124 AATATTGGTACTTCCTTTTTTGATCCTGCAGGTGGTGGTGACCCTGTGTTATTTCAACAT 65

Query 190 TTATTTTGGTTTTTTGGTCATCCAGAAGTTTACGTAATTATTTTCTGCAATTTGGCATC 249
      |||
Sbjct 64 TTATTTTGGTTTTTTGGTCATCCAGAAGTTTACGTAATTATTTTCTGCAATTTGGCATC 5

Query 250 ATAA 253
      |||
Sbjct 4 ATAA 1
```

> 21022630 length 201 cvg\_1.0\_tip\_0  
Length=201

Score = 333 bits (180), Expect = 2e-89  
Identities = 194/201 (97%), Gaps = 0/201 (0%)  
Strand=Plus/Minus

```
Query 31 ATGCCACTGTTTGGTCTGTCTTGCTAACAGCATTATGTTGATTGTTGCCTTACCA 90
|
Sbjct 201 ATGCCACTGTTTGGTCTGTCTTGCTAACAGCATTATGTTGATTGTTGCCTTACCA 142

Query 91 GTGCTTGCCGGTGCTATAACTATGCTTCTTACTGATCGCAATATTGGTACTTCCTTTTTT 150
|
Sbjct 141 GTGTTTGCCGGTGCTATAACTATGCTTCTTACTGATCGCCATGTTGGTACTTCCTTTTTT 82

Query 151 GATCCTGCAGGTGGTGGTGACCCTGTGTTATTTCAACATTTATTTTGGTTTTTGGTCAT 210
|
Sbjct 81 GATCCTGCCGGTGGCGGTGATCCTGTGTTATTTCAACATCTATTTTGGTTTTTGGTCAT 22

Query 211 CCAGAAGTTTACGTAATTATT 231
|
Sbjct 21 CCAGAAGTTTACGTAATTATT 1
```

> 22438024 length 412 cvg\_32.5\_tip\_0  
Length=412

Score = 279 bits (151), Expect = 2e-73  
Identities = 151/151 (100%), Gaps = 0/151 (0%)  
Strand=Plus/Plus

```
Query 252 AAGTCAGGTTGTATCAACTTTTTCTCACAGACCTGTATTTGGTTACATAGGGATGGTTTA 311
|
Sbjct 1 AAGTCAGGTTGTATCAACTTTTTCTCACAGACCTGTATTTGGTTACATAGGGATGGTTTA 60

Query 312 TGCAATGATAGGTATAGCAGTATTTGGCTTTATGGTTTGGGCTCACCATATGTTCACTGT 371
|
Sbjct 61 TGCAATGATAGGTATAGCAGTATTTGGCTTTATGGTTTGGGCTCACCATATGTTCACTGT 120

Query 372 TGGGCTTAGTGCTGACGCTGCTGCATTTTTT 402
|
Sbjct 121 TGGGCTTAGTGCTGACGCTGCTGCATTTTTT 151
```

> 21190622 length 208 cvg\_1.0\_tip\_1  
Length=208

Score = 272 bits (147), Expect = 3e-71  
Identities = 157/162 (97%), Gaps = 0/162 (0%)  
Strand=Plus/Minus

```
Query 1 ATGCGCACAAAAGGAATGTCATTAACCTAAGATGCCACTGTTTGGTCTGTCTTGCTA 60
|
Sbjct 162 ATGCGCACAAAAGGAATATCATTAACTAAGATGACACTGTTTGGTATGTCTTGCTA 103

Query 61 ACAGCATTTATGTTGATTGTTGCCTTACCAGTGCTTGCCGGTGCTATAACTATGCTTCTT 120
|
Sbjct 102 ACAGCATTTATGTTGATTATTGCCTTACCAGTGCTTGCCGGTGCTATAACTATGCTTCTT 43

Query 121 ACTGATCGCAATATTGGTACTTCCTTTTTTATCCTGCAGGT 162
|
Sbjct 42 ACTGATCGAAATATTGGTACTTCCTTTTTTATCCTGCAGGT 1
```

> 20023104 length 162 cvg\_62.7\_tip\_0  
Length=162

Score = 267 bits (144), Expect = 2e-69  
Identities = 156/162 (96%), Gaps = 0/162 (0%)  
Strand=Plus/Minus

```
Query 70 ATGTTGATTGTTGCCTTACCAGTGCTTGCCGGTGCTATAACTATGCTTCTTACTGATCGC 129
|||||
Sbjct 162 ATGTTGATTGTTGCCTTACCAGTGCTTGCCGGTGCTATAACTATGCTTCTTACTGATCGC 103

Query 130 AATATTGGTACTTCCTTTTTTGGATCCTGCAGGTGGTGGTGACCCTGTGTTATTTCAACAT 189
||| |||||
Sbjct 102 AATGTTGGTACTTCCTTTTTTGGATCCTGCAGGTGGCGGAGATCCTGTGTTATTTCAACAT 43

Query 190 TTATTTTGGTTTTTTTGGTCATCCAGAAGTTTACGTAATTATT 231
|||||
Sbjct 42 CTATTTTGGTTTTTTTGGTCATCCAGAAGTTTACGTAATTATT 1
```

> 18361237 length 127 cvg\_2.0\_tip\_0  
Length=127

Score = 224 bits (121), Expect = 1e-56  
Identities = 125/127 (98%), Gaps = 0/127 (0%)  
Strand=Plus/Minus

```
Query 219 TTACGTAATTATTTTTCCTGCATTTGGCATCATAAGTCAGGTTGTATCAACTTTTTCTCA 278
|||||
Sbjct 127 TTACGTAATTATTTTTCCTGCATTTGGCATCATAAGTCAGGTTGTATCAACTTTTTCTCA 68

Query 279 CAGACCTGTATTTGGTTACATAGGGATGGTTTATGCAATGATAGGTATAGCAGTATTTGG 338
||| |||||
Sbjct 67 CAGGCTGTATTTGGTTACATAGGGATGGTTTATGCTATGATAGGTATAGCAGTATTTGG 8

Query 339 CTTTATG 345
|||||
Sbjct 7 CTTTATG 1
```

> 14852056 length 102 cvg\_61.1\_tip\_0  
Length=102

Score = 189 bits (102), Expect = 4e-46  
Identities = 102/102 (100%), Gaps = 0/102 (0%)  
Strand=Plus/Minus

```
Query 31 ATGCCACTGTTTGGTCTGTCTTGCTAACAGCATTATGTTGATTGTTGCCTTACCA 90
|||||
Sbjct 102 ATGCCACTGTTTGGTCTGTCTTGCTAACAGCATTATGTTGATTGTTGCCTTACCA 43

Query 91 GTGCTTGCCGGTGCTATAACTATGCTTCTTACTGATCGCAAT 132
|||||
Sbjct 42 GTGCTTGCCGGTGCTATAACTATGCTTCTTACTGATCGCAAT 1
```

> 14331621 length 96 cvg\_63.0\_tip\_0  
Length=96

Score = 178 bits (96), Expect = 8e-43  
Identities = 96/96 (100%), Gaps = 0/96 (0%)  
Strand=Plus/Minus

```
Query 219 TTACGTAATTATTTTTCCTGCATTTGGCATCATAAGTCAGGTTGTATCAACTTTTTCTCA 278
|||||
Sbjct 96 TTACGTAATTATTTTTCCTGCATTTGGCATCATAAGTCAGGTTGTATCAACTTTTTCTCA 37

Query 279 CAGACCTGTATTTGGTTACATAGGGATGGTTTATGC 314
```

Sbjct 36 |||||  
CAGACCTGTATTTGGTTACATAGGGATGGTTTATGC 1

> 15243986 length 107 cvg\_63.0\_tip\_0  
Length=107

Score = 172 bits (93), Expect = 4e-41  
Identities = 93/93 (100%), Gaps = 0/93 (0%)  
Strand=Plus/Plus

Query 1 ATGCGCACAAAAGGAATGTCATTAAGATGCCACTGTTTGGTCTGTCTTGCTA 60  
Sbjct 15 ATGCGCACAAAAGGAATGTCATTAAGATGCCACTGTTTGGTCTGTCTTGCTA 74

Query 61 ACAGCATTTATGTTGATTGTTGCCTTACCAGTG 93  
Sbjct 75 ACAGCATTTATGTTGATTGTTGCCTTACCAGTG 107

> 14097458 length 94 cvg\_63.0\_tip\_0  
Length=94

Score = 169 bits (91), Expect = 5e-40  
Identities = 93/94 (99%), Gaps = 0/94 (0%)  
Strand=Plus/Plus

Query 252 AAGTCAGGTTGTATCAACTTTTTCTCACAGACCTGTATTTGGTTACATAGGGATGGTTTA 311  
Sbjct 1 AAGTCAGGTTGTATCAACTTTTTCTCACAGACCTGTATTTGGTTACATAGGGATGGTTTA 60

Query 312 TGCAATGATAGGTATAGCAGTATTTGGCTTTATG 345  
Sbjct 61 TGCTATGATAGGTATAGCAGTATTTGGCTTTATG 94

> 13770563 length 91 cvg\_63.0\_tip\_0  
Length=91

Score = 169 bits (91), Expect = 5e-40  
Identities = 91/91 (100%), Gaps = 0/91 (0%)  
Strand=Plus/Minus

Query 191 TATTTTGGTTTTTTGGTTCATCCAGAAGTTTACGTAATTATTTTCTGCATTTGGCATCA 250  
Sbjct 91 TATTTTGGTTTTTTGGTTCATCCAGAAGTTTACGTAATTATTTTCTGCATTTGGCATCA 32

Query 251 TAAGTCAGGTTGTATCAACTTTTTCTCACAG 281  
Sbjct 31 TAAGTCAGGTTGTATCAACTTTTTCTCACAG 1

> 14514057 length 98 cvg\_63.0\_tip\_0  
Length=98

Score = 159 bits (86), Expect = 3e-37  
Identities = 94/98 (96%), Gaps = 0/98 (0%)  
Strand=Plus/Minus

Query 283 CCTGTATTTGGTTACATAGGGATGGTTTATGCAATGATAGGTATAGCAGTATTTGGCTTT 342  
Sbjct 98 CCTGTATTTGGTTACATAGGGATGGTTTATGCTATGATAGGTATAGCAGTATTTGGCTTT 39



```
Query 343 ATGGTTTGGGCTCACCATATGTTCACTGTTGGGCTTAG 380
          ||||| |||| ||| |||||||||||||||||||||||||
Sbjct 38 ATGGTGTGGGTTTCATCATATGTTCACTGTTGGGCTTAG 1
```

> 13017009 length 85 cvg\_63.0\_tip\_0  
Length=85

Score = 147 bits (79), Expect = 2e-33  
Identities = 81/82 (99%), Gaps = 0/82 (0%)  
Strand=Plus/Minus

```
Query 172 CCTGTGTTATTTCAACATTTATTTTGGTTTTTTGGTCATCCAGAAGTTTACGTAATTATT 231
          ||||||||||||||||||| |||||||||||||||||||||||||||||||||||
Sbjct 82 CCTGTGTTATTTCAACATCTATTTTGGTTTTTTGGTCATCCAGAAGTTTACGTAATTATT 23
```

```
Query 232 TTCCTGCATTTGGCATCATAA 253
          |||||||||||||||||||
Sbjct 22 TTCCTGCATTTGGCATCATAA 1
```

> 18281483 length 127 cvg\_63.0\_tip\_0  
Length=127

Score = 141 bits (76), Expect = 1e-31  
Identities = 82/85 (96%), Gaps = 0/85 (0%)  
Strand=Plus/Plus

```
Query 318 GATAGGTATAGCAGTATTTGGCTTTATGGTTTGGGCTCACCATATGTTCACTGTTGGGCT 377
          ||||||||||||||||||| |||| ||| |||||||||||||||||||
Sbjct 1 GATAGGTATAGCAGTATTTGGCTTTATGGTGTGGGTTTCATCATATGTTCACTGTTGGGCT 60
```

```
Query 378 TAGTGCTGACGCTGCTGCATTTTTTT 402
          |||||||||||||||||||
Sbjct 61 TAGTGCTGACGCTGCTGCATTTTTTT 85
```

> 17442278 length 126 cvg\_2.0\_tip\_0  
Length=126

Score = 134 bits (72), Expect = 2e-29  
Identities = 81/85 (95%), Gaps = 1/85 (1%)  
Strand=Plus/Minus

```
Query 318 GATAGGTATAGCAGTATTTGGCTTTATGGTTTGGGCTCACCATATGTTCACTGTTGGGCT 377
          ||||||||||||||||||| |||| ||| |||||||||||||||||||
Sbjct 126 GATAGGTATAGCAGTATTTGGCTTTATGGTGTGGGTTTCATCATATGTTCACTGTTGGGCT 67
```

```
Query 378 TAGTGCTGACGCTGCTGCATTTTTTT 402
          ||| |||||||||||||||||||
Sbjct 66 TAG-GCTGACGCTGCTGCATTTTTTT 43
```

Lambda K H  
1.33 0.621 1.12

Gapped  
Lambda K H  
1.28 0.460 0.850

Effective search space used: 383284603108

## Query= fstZ\_Wolbachia\_Host\_E.serratulae

Length=435

| Sequences producing significant alignments: | Score (Bits) | E Value |
|---------------------------------------------|--------------|---------|
| 20372568 length 175 cvg_39.8_tip_0          | 324          | 1e-86   |
| 20373274 length 175 cvg_62.6_tip_0          | 313          | 2e-83   |
| 18459913 length 127 cvg_41.4_tip_0          | 235          | 5e-60   |
| 21442191 length 221 cvg_1.0_tip_1           | 230          | 2e-58   |
| 22135616 length 301 cvg_38.6_tip_0          | 228          | 8e-58   |
| 17614347 length 127 cvg_2.0_tip_0           | 224          | 1e-56   |
| 20450530 length 179 cvg_63.0_tip_0          | 217          | 2e-54   |
| 15315059 length 108 cvg_63.0_tip_0          | 200          | 2e-49   |
| 21144322 length 206 cvg_1.0_tip_0           | 193          | 3e-47   |
| 14485123 length 98 cvg_63.0_tip_0           | 182          | 6e-44   |
| 14246929 length 95 cvg_61.9_tip_0           | 176          | 3e-42   |
| 14373293 length 97 cvg_63.0_tip_0           | 174          | 1e-41   |
| 13200020 length 86 cvg_63.0_tip_0           | 159          | 3e-37   |
| 12489093 length 82 cvg_63.0_tip_0           | 147          | 2e-33   |
| 10590477 length 74 cvg_63.0_tip_0           | 132          | 7e-29   |
| 19289967 length 138 cvg_2.0_tip_0           | 128          | 8e-28   |
| 14421785 length 97 cvg_63.0_tip_0           | 119          | 5e-25   |
| 20052480 length 163 cvg_55.0_tip_0          | 117          | 2e-24   |
| 21412982 length 219 cvg_1.0_tip_1           | 108          | 1e-21   |

> 20372568 length 175 cvg\_39.8\_tip\_0  
Length=175

Score = 324 bits (175), Expect = 1e-86  
Identities = 175/175 (100%), Gaps = 0/175 (0%)  
Strand=Plus/Plus

```
Query 228 TAGAATTGCAAATGAAAAAACTACATTTTCTGATGCATTTAAACTTGCTGATAATGTTCT 287
          |||
Sbjct 1 TAGAATTGCAAATGAAAAAACTACATTTTCTGATGCATTTAAACTTGCTGATAATGTTCT 60

Query 288 GCACATTGGCATCAGAGGAGTAACTGACTTGATGGTCATGCCAGGGCTTATCAATCTTGA 347
          |||
Sbjct 61 GCACATTGGCATCAGAGGAGTAACTGACTTGATGGTCATGCCAGGGCTTATCAATCTTGA 120

Query 348 CTTGCTGATATAGAAACAGTAATGAGCGAGATGGGCAAAGCGATGATCGGCACC 402
          |||
Sbjct 121 CTTGCTGATATAGAAACAGTAATGAGCGAGATGGGCAAAGCGATGATCGGCACC 175
```

> 20373274 length 175 cvg\_62.6\_tip\_0  
Length=175

Score = 313 bits (169), Expect = 2e-83  
Identities = 173/175 (99%), Gaps = 0/175 (0%)  
Strand=Plus/Plus

```
Query 228 TAGAATTGCAAATGAAAAAACTACATTTTCTGATGCATTTAAACTTGCTGATAATGTTCT 287
          |||
Sbjct 1 TAGAATTGCAAATGAAAAAACTACATTTTCTGATGCATTTAAACTTGCTGATAATGTTCT 60

Query 288 GCACATTGGCATCAGAGGAGTAACTGACTTGATGGTCATGCCAGGGCTTATCAATCTTGA 347
```

```
Sbjct 61      ||| ||||||||||||||||||||||||||||||||||||||||||||||||||||||| 120
GCATATTGGCATCAGAGGAGTAACTGACTTGATGGTCATGCCAGGGCTTATTAATCTTGA

Query 348     CTTCGCTGATATAGAAACAGTAATGAGCGAGATGGGCAAAGCGATGATCGGCACC 402
|||||||||||||||||||||||||||||||||||||||||||||||||||||||||

Sbjct 121     CTTCGCTGATATAGAAACAGTAATGAGCGAGATGGGCAAAGCGATGATCGGCACC 175
```

> 18459913 length 127 cvg\_41.4\_tip\_0
Length=127

Score = 235 bits (127), Expect = 5e-60
Identities = 127/127 (100%), Gaps = 0/127 (0%)
Strand=Plus/Plus

```
Query 84      AGaaaaaaaaGATATTGACTGTTGGAGTTGTAATAAACCGTTCGGTTTTGAAGGTGTGCG 143
|||||||||||||||||||||||||||||||||||||||||||||||||||||||||

Sbjct 1       AGAAAAAAAAAGATATTGACTGTTGGAGTTGTAATAAACCGTTCGGTTTTGAAGGTGTGCG 60

Query 144     CCGTATGCGCATTGCAGAGCTTGGACTTGAAGAACTGCAAAAATACGTGGATACACTTAT 203
|||||||||||||||||||||||||||||||||||||||||||||||||||||||||

Sbjct 61      CCGTATGCGCATTGCAGAGCTTGGACTTGAAGAACTGCAAAAATACGTGGATACACTTAT 120

Query 204     TGTCATT 210
|||||||
Sbjct 121     TGTCATT 127
```

> 21442191 length 221 cvg\_1.0\_tip\_1
Length=221

Score = 230 bits (124), Expect = 2e-58
Identities = 134/139 (96%), Gaps = 0/139 (0%)
Strand=Plus/Plus

```
Query 297     CATCAGAGGAGTAACTGACTTGATGGTCATGCCAGGGCTTATCAATCTTGACTTCGCTGA 356
|||||||||||||||||||||||||||||| || |||||||||||||| |||||||||||||||

Sbjct 1       CATCAGAGGAGTAACTGACTTGATGGGCAGGCCAGGGCTTATTAATCTTGACTTCGCTGA 60

Query 357     TATAGAAACAGTAATGAGCGAGATGGGCAAAGCGATGATCGGCACCGGAGAGGCAGAAGG 416
|| |||||||||||||||||||||||||||||||||||||||||||||||||||||||

Sbjct 61      TAGAGAAACAGTAATGAGCGAGATGGGCAAAGCGATGATCTGCACCGGAGAGGCAGAAGG 120

Query 417     AGAAGATAGAGCAATTAGT 435
|||||||||||||||||||||
Sbjct 121     AGAAGATAGAGCAATTAGT 139
```

> 22135616 length 301 cvg\_38.6\_tip\_0
Length=301

Score = 228 bits (123), Expect = 8e-58
Identities = 123/123 (100%), Gaps = 0/123 (0%)
Strand=Plus/Plus

```
Query 1       GGTGGTACTGGAACCGGTGCAGCACCGGTAATTGCAAAAAGCAGCCAGAGAAGCAAGAGCC 60
|||||||||||||||||||||||||||||||||||||||||||||||||||||||||

Sbjct 179     GGTGGTACTGGAACCGGTGCAGCACCGGTAATTGCAAAAAGCAGCCAGAGAAGCAAGAGCC 238

Query 61      GCAGTTAAGGATAGAGCGCCAAAAGaaaaaaaaGATATTGACTGTTGGAGTTGTAATAAAA 120
|||||||||||||||||||||||||||||||||||||||||||||||||||||||||

Sbjct 239     GCAGTTAAGGATAGAGCGCCAAAAGAAAAAAAAAGATATTGACTGTTGGAGTTGTAATAAAA 298
```

Query 121 CCG 123  
|||  
Sbjct 299 CCG 301

> 17614347 length 127 cvg\_2.0\_tip\_0  
Length=127

Score = 224 bits (121), Expect = 1e-56  
Identities = 125/127 (98%), Gaps = 0/127 (0%)  
Strand=Plus/Minus

Query 129 TTTTGAAGGTGTGCGCCGATGCGCATTGCAGAGCTTGGACTTGAAGAAGTGCAAAAATA 188  
|||||  
Sbjct 127 TTTTGAAGGTGTGCGCCGATGCGCATTGCAGAGCTTGGACTTGAAGAAGTGCAAAAATA 68

Query 189 CGTGGATACACTTATTGTCATTCCAAATCAGAATTTATTTAGAATTGCAAATGAAAAAAC 248  
|||  
Sbjct 67 CGTTGATACACTTATTGTCATTCCAAATCAGAATTTATTTAGAATTGCAAATGAAAAAAC 8

Query 249 TACATTT 255  
|||||  
Sbjct 7 TACATTT 1

> 20450530 length 179 cvg\_63.0\_tip\_0  
Length=179

Score = 217 bits (117), Expect = 2e-54  
Identities = 121/123 (98%), Gaps = 0/123 (0%)  
Strand=Plus/Minus

Query 1 GGTGGTACTGGAACCGGTGCAGCACCGGTAATTGCAAAAGCAGCCAGAGAAGCAAGAGCC 60  
|||||  
Sbjct 123 GGTGGTACCGGAACCGGTGCAGCACCGGTAATTGCAAAAGCAGCCAGAGAAGCAAGAGCT 64

Query 61 GCAGTTAAGGATAGAGCGCCAAAAGaaaaaaaGATATTGACTGTTGGAGTTGTAATAAAA 120  
|||||  
Sbjct 63 GCAGTTAAGGATAGAGCGCCAAAAGAAAAAAGATATTGACTGTTGGAGTTGTAATAAAA 4

Query 121 CCG 123  
|||  
Sbjct 3 CCG 1

> 15315059 length 108 cvg\_63.0\_tip\_0  
Length=108

Score = 200 bits (108), Expect = 2e-49  
Identities = 108/108 (100%), Gaps = 0/108 (0%)  
Strand=Plus/Plus

Query 148 ATGCGCATTGCAGAGCTTGGACTTGAAGAAGTGCAAAAATACGTGGATACACTTATTGTC 207  
|||||  
Sbjct 1 ATGCGCATTGCAGAGCTTGGACTTGAAGAAGTGCAAAAATACGTGGATACACTTATTGTC 60

Query 208 ATTCCAAATCAGAATTTATTTAGAATTGCAAATGAAAAAACTACATTT 255  
|||||  
Sbjct 61 ATTCCAAATCAGAATTTATTTAGAATTGCAAATGAAAAAACTACATTT 108

> 21144322 length 206 cvg\_1.0\_tip\_0  
Length=206

Score = 193 bits (104), Expect = 3e-47  
Identities = 110/113 (97%), Gaps = 0/113 (0%)  
Strand=Plus/Minus

```
Query 323 TCATGCCAGGGCTTATCAATCTTGACTTCGCTGATATAGAAACAGTAATGAGCGAGATGG 382
          |||
Sbjct 146 TCATGCCAGGGCTTATTAATCTTGACTTCGCTGATATGGAACAGTAATGAGCGAGATGG 87

Query 383 GCAAAGCGATGATCGGCACCGGAGAGGCAGAAGGAGAAGATAGAGCAATTAGT 435
          |||
Sbjct 86 GCAAAGCGATGATCGGCACCGGGGAGGCAGAAGGAGAAGATAGAGCAATTAGT 34
```

> 14485123 length 98 cvg\_63.0\_tip\_0  
Length=98

Score = 182 bits (98), Expect = 6e-44  
Identities = 98/98 (100%), Gaps = 0/98 (0%)  
Strand=Plus/Minus

```
Query 193 GATACTTATTGTCATTCCAAATCAGAATTTATTTAGAATTGCAAATGAAAAAACTACA 252
          |||
Sbjct 98 GATACTTATTGTCATTCCAAATCAGAATTTATTTAGAATTGCAAATGAAAAAACTACA 39

Query 253 TTTTCTGATGCATTTAAACTTGCTGATAATGTTCTGCA 290
          |||
Sbjct 38 TTTTCTGATGCATTTAAACTTGCTGATAATGTTCTGCA 1
```

> 14246929 length 95 cvg\_61.9\_tip\_0  
Length=95

Score = 176 bits (95), Expect = 3e-42  
Identities = 95/95 (100%), Gaps = 0/95 (0%)  
Strand=Plus/Minus

```
Query 340 AATCTTGACTTCGCTGATATAGAAACAGTAATGAGCGAGATGGGCAAAGCGATGATCGGC 399
          |||
Sbjct 95 AATCTTGACTTCGCTGATATAGAAACAGTAATGAGCGAGATGGGCAAAGCGATGATCGGC 36

Query 400 ACCGGAGAGGCAGAAGGAGAAGATAGAGCAATTAG 434
          |||
Sbjct 35 ACCGGAGAGGCAGAAGGAGAAGATAGAGCAATTAG 1
```

> 14373293 length 97 cvg\_63.0\_tip\_0  
Length=97

Score = 174 bits (94), Expect = 1e-41  
Identities = 96/97 (99%), Gaps = 0/97 (0%)  
Strand=Plus/Plus

```
Query 84 AGaaaaaaGATATTGACTGTTGGAGTTGTAACTAAACCGTTCGGTTTTGAAGGTGTGCG 143
          |||
Sbjct 1 AGAAAAAAGATATTGACTGTTGGAGTTGTAACTAAACCGTTCGGTTTTGAAGGTGTGCG 60

Query 144 CCGTATGCGCATTGCAGAGCTTGGACTTGAAGAACTG 180
          |||
Sbjct 61 CCGCATGCGCATTGCAGAGCTTGGACTTGAAGAACTG 97
```

> 13200020 length 86 cvg\_63.0\_tip\_0

Length=86

Score = 159 bits (86), Expect = 3e-37  
Identities = 86/86 (100%), Gaps = 0/86 (0%)  
Strand=Plus/Minus

```
Query 61 GCAGTTAAGGATAGAGCGCCAAAAGaaaaaaaaGATATTGACTGTTGGAGTTGTA ACTAAA 120
          |||
Sbjct 86 GCAGTTAAGGATAGAGCGCCAAAAGAAAAAAGATATTGACTGTTGGAGTTGTA ACTAAA 27

Query 121 CCGTTCGGTTTTGAAGGTGTGCGCCG 146
          |||
Sbjct 26 CCGTTCGGTTTTGAAGGTGTGCGCCG 1
```

> 12489093 length 82 cvg\_63.0\_tip\_0  
Length=82

Score = 147 bits (79), Expect = 2e-33  
Identities = 81/82 (99%), Gaps = 0/82 (0%)  
Strand=Plus/Minus

```
Query 129 TTTTGAAGGTGTGCGCCGATGCGCATTGCAGAGCTTGGACTTGAAGAACTGCAAAAATA 188
          |||
Sbjct 82 TTTTGAAGGTGTGCGCCGATGCGCATTGCAGAGCTTGGACTTGAAGAACTGCAAAAATA 23

Query 189 CGTGGATACACTTATTGTCATT 210
          |||
Sbjct 22 CGTGGATACACTTATTGTCATT 1
```

> 10590477 length 74 cvg\_63.0\_tip\_0  
Length=74

Score = 132 bits (71), Expect = 7e-29  
Identities = 73/74 (99%), Gaps = 0/74 (0%)  
Strand=Plus/Plus

```
Query 118 AAACCGTTCGGTTTTGAAGGTGTGCGCCGATGCGCATTGCAGAGCTTGGACTTGAAGAA 177
          |||
Sbjct 1 AAACCGTTCGGTTTTGAAGGTGTGCGCCGATGCGCATTGCAGAGCTTGGACTTGAAGAA 60

Query 178 CTGCAAAAATACGT 191
          |||
Sbjct 61 CTGCAAAAATACGT 74
```

> 19289967 length 138 cvg\_2.0\_tip\_0  
Length=138

Score = 128 bits (69), Expect = 8e-28  
Identities = 74/76 (97%), Gaps = 1/76 (1%)  
Strand=Plus/Plus

```
Query 118 AAACCGTTCGGTTTTGAAGGTGTGCGCCGATGCGCATTGCAGAGCTTGGACTTGAAGAA 177
          |||
Sbjct 1 AAACCGTTCGGTTTTGAAGGTGTGCGCCGATGCGCATTGCAGAGCTTGGACTTGAAGAA 60

Query 178 CTGCAAAAATACGTGG 193
          |||
Sbjct 61 CTG-AAAAATACGTGG 75
```

> 14421785 length 97 cvg\_63.0\_tip\_0  
Length=97

Score = 119 bits (64), Expect = 5e-25  
Identities = 64/64 (100%), Gaps = 0/64 (0%)  
Strand=Plus/Minus

```
Query 372 GAGCGAGATGGGCAAAGCGATGATCGGCACCGGAGAGGCAGAAGGAGAAGATAGAGCAAT 431
          |||
Sbjct 97  GAGCGAGATGGGCAAAGCGATGATCGGCACCGGAGAGGCAGAAGGAGAAGATAGAGCAAT 38

Query 432 TAGT 435
          |||
Sbjct 37  TAGT 34
```

> 20052480 length 163 cvg\_55.0\_tip\_0  
Length=163

Score = 117 bits (63), Expect = 2e-24  
Identities = 63/63 (100%), Gaps = 0/63 (0%)  
Strand=Plus/Minus

```
Query 372 GAGCGAGATGGGCAAAGCGATGATCGGCACCGGAGAGGCAGAAGGAGAAGATAGAGCAAT 431
          |||
Sbjct 163 GAGCGAGATGGGCAAAGCGATGATCGGCACCGGAGAGGCAGAAGGAGAAGATAGAGCAAT 104

Query 432 TAG 434
          |||
Sbjct 103 TAG 101
```

> 21412982 length 219 cvg\_1.0\_tip\_1  
Length=219

Score = 108 bits (58), Expect = 1e-21  
Identities = 60/61 (98%), Gaps = 0/61 (0%)  
Strand=Plus/Plus

```
Query 229 AGAATTGCAAATGAAAAAACTACATTTTCTGATGCATTTAAACTTGCTGATAATGTTCTG 288
          |||
Sbjct 159 AGAATTGAAAATGAAAAAACTACATTTTCTGATGCATTTAAACTTGCTGATAATGTTCTG 218

Query 289 C 289
          |
Sbjct 219 C 219
```

Lambda K H  
1.33 0.621 1.12

Gapped  
Lambda K H  
1.28 0.460 0.850

Effective search space used: 417103832794

## Query= gatB\_Wolbachia\_Host\_E.serratulae

Length=369

| Sequences producing significant alignments: | Score (Bits) | E Value |
|---------------------------------------------|--------------|---------|
| 21381538 length 218 cvg_1.0_tip_1           | 357          | 8e-97   |
| 20417994 length 177 cvg_2.0_tip_0           | 316          | 1e-84   |
| 20741170 length 191 cvg_1.0_tip_1           | 305          | 3e-81   |
| 20109650 length 165 cvg_63.0_tip_0          | 294          | 7e-78   |
| 19292641 length 138 cvg_33.4_tip_0          | 255          | 3e-66   |
| 18969591 length 130 cvg_63.0_tip_0          | 230          | 2e-58   |
| 18736645 length 127 cvg_2.0_tip_0           | 230          | 2e-58   |
| 18076019 length 127 cvg_63.0_tip_0          | 211          | 7e-53   |
| 14638785 length 99 cvg_47.0_tip_0           | 183          | 1e-44   |
| 15078638 length 105 cvg_46.9_tip_0          | 176          | 2e-42   |
| 14245495 length 95 cvg_63.0_tip_0           | 176          | 2e-42   |
| 21871023 length 258 cvg_1.0_tip_1           | 171          | 1e-40   |
| 13582182 length 89 cvg_32.4_tip_0           | 165          | 5e-39   |
| 13402912 length 88 cvg_49.6_tip_0           | 163          | 2e-38   |
| 13056619 length 85 cvg_44.0_tip_0           | 158          | 9e-37   |
| 13056441 length 85 cvg_63.0_tip_0           | 158          | 9e-37   |
| 21564999 length 229 cvg_37.0_tip_0          | 135          | 4e-30   |
| 10262355 length 73 cvg_63.0_tip_0           | 135          | 4e-30   |
| 10213031 length 72 cvg_63.0_tip_0           | 134          | 2e-29   |
| 8722663 length 69 cvg_47.0_tip_0            | 128          | 7e-28   |
| 20838530 length 194 cvg_62.4_tip_0          | 124          | 9e-27   |
| 3629341 length 64 cvg_0.0_tip_0             | 119          | 4e-25   |

> 21381538 length 218 cvg\_1.0\_tip\_1  
Length=218

**Not in Wolbachia MLST database, Blast -> most related Drosophila ananassae sequence.  
But this latter sequence is identical to Wol-allele 22**

Score = 357 bits (193), Expect = 8e-97  
Identities = 209/217 (96%), Gaps = 0/217 (0%)  
Strand=Plus/Plus

```
Query 153 AAATCTGAACTCGATACGTTATATTGTGCAAGCTATAGACTATGAAATACAAAGACAAAT 212
          |||
Sbjct 1 AAATCTGAACTCGATACGTTATATTGTGCAAGCTATAGACTATGAAATACAAAGACAAAT 60

Query 213 TGAAATTTTAGAAAGTGGGGAAGAAATAAGTCAAGATACCTTATTGTTTGATGTTGCTTC 272
          |||
Sbjct 61 TGACATTTTAGAAAGTGGGGAAGAAATAAGTCAACTATACCTTATTGTTTGATGTTGCTTC 120

Query 273 GGGAAAACAAAAGTGATGCGAAACAAAGAAGATGCAAGCGACTATAGATACTTCCCTGA 332
          |||
Sbjct 121 GGGAAACACAACAGTGATGCGAAACAAAGAAGATGCAAGCGCCTACAGATACTTCCCTGA 180

Query 333 GCCTGATTTATTACCTGTTGAGGTAAGGCAGGATAAA 369
          |||
Sbjct 181 GCCCGATTTATTACCTGTTGAGGTAAGGCAGGATAAA 217
```

> 20417994 length 177 cvg\_2.0\_tip\_0  
Length=177

Score = 316 bits (171), Expect = 1e-84  
Identities = 175/177 (99%), Gaps = 0/177 (0%)



Strand=Plus/Minus

```
Query 125 GCGCACTTGGCACTCGTTGTGAGATAAAAAATCTGAACTCGATACGTTATATTGTGCAAG 184
          |||
Sbjct 177 GCGCACTTGGCACTCGTTGTGAGATAAAAAATCTGAACTCGATACGTTATATTGTGCAAG 118

Query 185 CTATAGACTATGAAATACAAAGACAAATTGAAATTTTAGAAAGTGGGGAAGAAATAAGTC 244
          |||
Sbjct 117 CTAAAGACTATGAAATACAAAGACAAATTGAAATTTTAGAAAGTGGGGAAGAAAGTAAGTC 58

Query 245 AAGATACCTTATTGTTTGATGTTGCTTCGGGAAAAACAAAAGTGATGCGAAACAAAG 301
          |||
Sbjct 57 AAGATACCTTATTGTTTGATGTTGCTTCGGGAAAAACAAAAGTGATGCGAAACAAAG 1
```

> 20741170 length 191 cvg\_1.0\_tip\_1  
Length=191

Score = 305 bits (165), Expect = 3e-81  
Identities = 171/174 (98%), Gaps = 0/174 (0%)  
Strand=Plus/Minus

```
Query 1 GAAGCTGCAGAATGCATGAAAAAATTGAGGCAGATTTTGC GTTACATTGGTTCGTGTGAT 60
          |||
Sbjct 174 GAAGCTGCAGAATGCATGAAAAAATTGAGGCAGATTTTGC GTTACAGTGGTTCGTGTGAT 115

Query 61 GGTGATATGGAAAAGGGATCACTTCGTTGTGATGCAAATGTTTCTGTCCGCCTAAAAGGC 120
          |||
Sbjct 114 GGTGATATGGAAAAGGGATCACGTCGTTGTGATGCAAATGTTTCTGTCCGACTAAAAGGC 55

Query 121 AGTAGCGCACTTGGCACTCGTTGTGAGATAAAAAATCTGAACTCGATACGTTAT 174
          |||
Sbjct 54 AGTAGCGCACTTGGCACTCGTTGTGAGATAAAAAATCTGAACTCGATACGTTAT 1
```

> 20109650 length 165 cvg\_63.0\_tip\_0  
Length=165

Score = 294 bits (159), Expect = 7e-78  
Identities = 163/165 (99%), Gaps = 0/165 (0%)  
Strand=Plus/Minus

```
Query 163 TCGATACGTTATATTGTGCAAGCTATAGACTATGAAATACAAAGACAAATTGAAATTTTA 222
          |||
Sbjct 165 TCGATACGTTATATTGTGCAAGCTATAGACTATGAAATACAAAGACAAATTGAAATTTTA 106

Query 223 GAAAGTGGGGAAGAAATAAGTCAAGATACCTTATTGTTTGATGTTGCTTCGGGAAAAACA 282
          |||
Sbjct 105 GAAGGTGGGGAAGAAATAAGTCAAGATACCTTATTGTTTGACGTTGCTTCGGGAAAAACA 46

Query 283 AAAGTGATGCGAAACAAAGAAGATGCAAGCGACTATAGATACTTC 327
          |||
Sbjct 45 AAAGTGATGCGAAACAAAGAAGATGCAAGCGACTATAGATACTTC 1
```

> 19292641 length 138 cvg\_33.4\_tip\_0  
Length=138

Score = 255 bits (138), Expect = 3e-66  
Identities = 138/138 (100%), Gaps = 0/138 (0%)  
Strand=Plus/Minus

```
Query 164 CGATACGTTATATTGTGCAAGCTATAGACTATGAAATACAAAGACAAATTGAAATTTTAG 223
```

```

|||||
Sbjct 138 CGATACGTTATATTGTGCAAGCTATAGACTATGAAATACAAAGACAAATTGAAATTTTAG 79
Query 224 AAAGTGGGGAAGAAATAAGTCAAGATACCTTATTGTTTGATGTTGCTTCGGGAAAAACAA 283
|||||
Sbjct 78 AAAGTGGGGAAGAAATAAGTCAAGATACCTTATTGTTTGATGTTGCTTCGGGAAAAACAA 19
Query 284 AAGTGATGCGAAACAAAG 301
|||||
Sbjct 18 AAGTGATGCGAAACAAAG 1

```

> 18969591 length 130 cvg\_63.0\_tip\_0  
Length=130

Score = 230 bits (124), Expect = 2e-58  
Identities = 128/130 (98%), Gaps = 0/130 (0%)  
Strand=Plus/Plus

```

Query 64 GATATGGAAAAGGGATCACTTCGTTGTGATGCAAATGTTTCTGTCCGCCTAAAAGGCAGT 123
|||||
Sbjct 1 GATATGGAAAAGGGATCACTTCGTTGTGATGCAAATGTTTCTGTCCGCCTAAAAGGCAGT 60
Query 124 AGCGCACTTGGCACTCGTTGTGAGATAAAAAATCTGAACTCGATACGTTATATTGTGCAA 183
||| || |||||
Sbjct 61 AGCACATTTGGCACTCGTTGTGAGATAAAAAATCTGAACTCGATACGTTATATTGTGCAA 120
Query 184 GCTATAGACT 193
|||||
Sbjct 121 GCTATAGACT 130

```

> 18736645 length 127 cvg\_2.0\_tip\_0  
Length=127

Score = 230 bits (124), Expect = 2e-58  
Identities = 126/127 (99%), Gaps = 0/127 (0%)  
Strand=Plus/Minus

```

Query 100 GTTTCTGTCCGCCTAAAAGGCAGTAGCGCACTTGGCACTCGTTGTGAGATAAAAAATCTG 159
|||||
Sbjct 127 GTTTCTGTCCGCCTAAAAGGCAGTAGCGCACTTGGCACTCGTTGTGAGATAAAAAATCTG 68
Query 160 AACTCGATACGTTATATTGTGCAAGCTATAGACTATGAAATACAAAGACAAATTGAAATT 219
||| |||||
Sbjct 67 AACCCGATACGTTATATTGTGCAAGCTATAGACTATGAAATACAAAGACAAATTGAAATT 8
Query 220 TTAGAAA 226
|||||
Sbjct 7 TTAGAAA 1

```

> 18076019 length 127 cvg\_63.0\_tip\_0  
Length=127

Score = 211 bits (114), Expect = 7e-53  
Identities = 116/117 (99%), Gaps = 0/117 (0%)  
Strand=Plus/Minus

```

Query 1 GAAGCTGCAGAATGCATGAAAAAATTGAGGCAGATTTTGC GTTACATTGGTTCGTGTGAT 60
|||||
Sbjct 117 GAAGCTGCAGAATGCATGAAAAAATTGAGGCAGATTTTGC GTTACATTGGTTCATGTGAT 58

```

Query 61 GGTGATATGGAAAAGGGATCACTTCGTTGTGATGCAAATGTTTCTGTCCGCCTAAAA 117  
|  
Sbjct 57 GGTGATATGGAAAAGGGATCACTTCGTTGTGATGCAAATGTTTCTGTCCGCCTAAAA 1

> 14638785 length 99 cvg\_47.0\_tip\_0  
Length=99

Score = 183 bits (99), Expect = 1e-44  
Identities = 99/99 (100%), Gaps = 0/99 (0%)  
Strand=Plus/Plus

Query 64 GATATGGAAAAGGGATCACTTCGTTGTGATGCAAATGTTTCTGTCCGCCTAAAAGGCAGT 123  
|  
Sbjct 1 GATATGGAAAAGGGATCACTTCGTTGTGATGCAAATGTTTCTGTCCGCCTAAAAGGCAGT 60

Query 124 AGCGCACTTGGCACTCGTTGTGAGATAAAAAATCTGAAC 162  
|  
Sbjct 61 AGCGCACTTGGCACTCGTTGTGAGATAAAAAATCTGAAC 99

> 15078638 length 105 cvg\_46.9\_tip\_0  
Length=105

Score = 176 bits (95), Expect = 2e-42  
Identities = 95/95 (100%), Gaps = 0/95 (0%)  
Strand=Plus/Minus

Query 1 GAAGCTGCAGAATGCATGAAAAAATTGAGGCAGATTTTTCGTTACATTGGTTCGTGTGAT 60  
|  
Sbjct 95 GAAGCTGCAGAATGCATGAAAAAATTGAGGCAGATTTTTCGTTACATTGGTTCGTGTGAT 36

Query 61 GGTGATATGGAAAAGGGATCACTTCGTTGTGATGC 95  
|  
Sbjct 35 GGTGATATGGAAAAGGGATCACTTCGTTGTGATGC 1

> 14245495 length 95 cvg\_63.0\_tip\_0  
Length=95

Score = 176 bits (95), Expect = 2e-42  
Identities = 95/95 (100%), Gaps = 0/95 (0%)  
Strand=Plus/Minus

Query 265 GTTGCTTCGGGAAAAACAAAAGTGATGCGAAACAAAGAAGATGCAAGCGACTATAGATAC 324  
|  
Sbjct 95 GTTGCTTCGGGAAAAACAAAAGTGATGCGAAACAAAGAAGATGCAAGCGACTATAGATAC 36

Query 325 TTCCCTGAGCCTGATTTATTACCTGTTGAGGTAAG 359  
|  
Sbjct 35 TTCCCTGAGCCTGATTTATTACCTGTTGAGGTAAG 1

> 21871023 length 258 cvg\_1.0\_tip\_1  
Length=258

Score = 171 bits (92), Expect = 1e-40  
Identities = 94/95 (99%), Gaps = 0/95 (0%)  
Strand=Plus/Plus

Query 1 GAAGCTGCAGAATGCATGAAAAAATTGAGGCAGATTTTTCGTTACATTGGTTCGTGTGAT 60  
|  
Sbjct 164 GAAGCTGCAGAATGCATGAAAAAATTGAGGCCGATTTTTCGTTACATTGGTTCGTGTGAT 223

Query 61 GGTGATATGGAAAAGGGATCACTTCGTTGTGATGC 95  
|  
Sbjct 224 GGTGATATGGAAAAGGGATCACTTCGTTGTGATGC 258

> 13582182 length 89 cvg\_32.4\_tip\_0  
Length=89

Score = 165 bits (89), Expect = 5e-39  
Identities = 89/89 (100%), Gaps = 0/89 (0%)  
Strand=Plus/Plus

Query 239 TAAGTCAAGATACCTTATTGTTTGATGTTGCTTCGGGAAAAACAAAAGTGATGCGAAACA 298  
|  
Sbjct 1 TAAGTCAAGATACCTTATTGTTTGATGTTGCTTCGGGAAAAACAAAAGTGATGCGAAACA 60

Query 299 AAGAAGATGCAAGCGACTATAGATACTTC 327  
|  
Sbjct 61 AAGAAGATGCAAGCGACTATAGATACTTC 89

> 13402912 length 88 cvg\_49.6\_tip\_0  
Length=88

Score = 163 bits (88), Expect = 2e-38  
Identities = 88/88 (100%), Gaps = 0/88 (0%)  
Strand=Plus/Minus

Query 100 GTTTCTGTCCGCCTAAAAGGCAGTAGCGCACTTGGCACTCGTTGTGAGATAAAAAATCTG 159  
|  
Sbjct 88 GTTTCTGTCCGCCTAAAAGGCAGTAGCGCACTTGGCACTCGTTGTGAGATAAAAAATCTG 29

Query 160 AACTCGATACGTTATATTGTGCAAGCTA 187  
|  
Sbjct 28 AACTCGATACGTTATATTGTGCAAGCTA 1

> 13056619 length 85 cvg\_44.0\_tip\_0  
Length=85

Score = 158 bits (85), Expect = 9e-37  
Identities = 85/85 (100%), Gaps = 0/85 (0%)  
Strand=Plus/Plus

Query 33 GATTTTGC GTTACATTGGTTTCGTGTGATGGTGATATGGAAAAGGGATCACTTCGTTGTGA 92  
|  
Sbjct 1 GATTTTGC GTTACATTGGTTTCGTGTGATGGTGATATGGAAAAGGGATCACTTCGTTGTGA 60

Query 93 TGCAAATGTTTCTGTCCGCCTAAAA 117  
|  
Sbjct 61 TGCAAATGTTTCTGTCCGCCTAAAA 85

> 13056441 length 85 cvg\_63.0\_tip\_0  
Length=85

Score = 158 bits (85), Expect = 9e-37  
Identities = 85/85 (100%), Gaps = 0/85 (0%)  
Strand=Plus/Plus

Query 131 TTGGCACTCGTTGTGAGATAAAAAATCTGAACTCGATACGTTATATTGTGCAAGCTATAG 190  
|

Sbjct 1 TTGGCACTCGTTGTGAGATAAAAAATCTGAACTCGATACGTTATATTGTGCAAGCTATAG 60

Query 191 ACTATGAAATACAAAGACAAATTGA 215

|||||

Sbjct 61 ACTATGAAATACAAAGACAAATTGA 85

> 21564999 length 229 cvg\_37.0\_tip\_0

Length=229

Score = 135 bits (73), Expect = 4e-30  
Identities = 73/73 (100%), Gaps = 0/73 (0%)  
Strand=Plus/Plus

Query 297 CAAAGAAGATGCAAGCGACTATAGATACTTCCCTGAGCCTGATTTATTACCTGTTGAGGT 356

|||||

Sbjct 1 CAAAGAAGATGCAAGCGACTATAGATACTTCCCTGAGCCTGATTTATTACCTGTTGAGGT 60

Query 357 AAGGCAGGATAAA 369

|||||

Sbjct 61 AAGGCAGGATAAA 73

> 10262355 length 73 cvg\_63.0\_tip\_0

Length=73

Score = 135 bits (73), Expect = 4e-30  
Identities = 73/73 (100%), Gaps = 0/73 (0%)  
Strand=Plus/Plus

Query 153 AAATCTGAACTCGATACGTTATATTGTGCAAGCTATAGACTATGAAATACAAAGACAAAT 212

|||||

Sbjct 1 AAATCTGAACTCGATACGTTATATTGTGCAAGCTATAGACTATGAAATACAAAGACAAAT 60

Query 213 TGAAATTTTAGAA 225

|||||

Sbjct 61 TGAAATTTTAGAA 73

> 10213031 length 72 cvg\_63.0\_tip\_0

Length=72

Score = 134 bits (72), Expect = 2e-29  
Identities = 72/72 (100%), Gaps = 0/72 (0%)  
Strand=Plus/Plus

Query 55 TGTGATGGTGATATGGAAAAGGGATCACTTCGTTGTGATGCAAATGTTTCTGTCCGCTA 114

|||||

Sbjct 1 TGTGATGGTGATATGGAAAAGGGATCACTTCGTTGTGATGCAAATGTTTCTGTCCGCTA 60

Query 115 AAAGGCAGTAGC 126

|||||

Sbjct 61 AAAGGCAGTAGC 72

> 8722663 length 69 cvg\_47.0\_tip\_0

Length=69

Score = 128 bits (69), Expect = 7e-28  
Identities = 69/69 (100%), Gaps = 0/69 (0%)  
Strand=Plus/Minus

Query 125 GCGCACTTGGCACTCGTTGTGAGATAAAAAATCTGAACTCGATACGTTATATTGTGCAAG 184

```
|||||
Sbjct 69 GCGCACTTGGCACTCGTTGTGAGATAAAAAATCTGAACTCGATACGTTATATTGTGCAAG 10
```

```
Query 185 CTATAGACT 193
          |||||
Sbjct 9 CTATAGACT 1
```

```
> 20838530 length 194 cvg_62.4_tip_0
Length=194
```

```
Score = 124 bits (67), Expect = 9e-27
Identities = 71/73 (97%), Gaps = 0/73 (0%)
Strand=Plus/Plus
```

```
Query 297 CAAAGAAGATGCAAGCGACTATAGATACTTCCCTGAGCCTGATTTATTACCTGTTGAGGT 356
          |||||
Sbjct 1 CAAAGAAGATGCAAGCGACTATAGATACTTCCCTGAGCCTGATTTATTACCTGTTGAGGT 60
```

```
Query 357 AAGGCAGGATAAA 369
          ||| ||||| |||
Sbjct 61 AAGCCAGGAGAAA 73
```

```
> 3629341 length 64 cvg_0.0_tip_0
Length=64
```

```
Score = 119 bits (64), Expect = 4e-25
Identities = 64/64 (100%), Gaps = 0/64 (0%)
Strand=Plus/Plus
```

```
Query 163 TCGATACGTTATATTGTGCAAGCTATAGACTATGAAATACAAAGACAAATTGAAATTTTA 222
          |||||
Sbjct 1 TCGATACGTTATATTGTGCAAGCTATAGACTATGAAATACAAAGACAAATTGAAATTTTA 60
```

```
Query 223 GAAA 226
          ||||
Sbjct 61 GAAA 64
```

```
Lambda K H
1.33 0.621 1.12
```

```
Gapped
Lambda K H
1.28 0.460 0.850
```

```
Effective search space used: 349465373422
```
