# Supplementary material for: Tracing the history and ecological context of Wolbachia double infection in a specialist host (Urophora cardui)—parasitoid (Eurytoma serratulae) system
Source: PubMed Central journal article supplement (PMC5288247; doi:10.1002/ece3.2713), 2017-01-17

**Appendix S5.** Johannesen, J.: Tracing the history and ecological context of *Wolbachia* double infection in a specialist host (*Urophora cardui*) – parasitoid (*Eurytoma serratulae*) system

Regression of double infection (DI) on *E. serratulae* parasitisation rates in *U. cardui* populations. The analysis was performed on 44 populations for which both parameters were available.

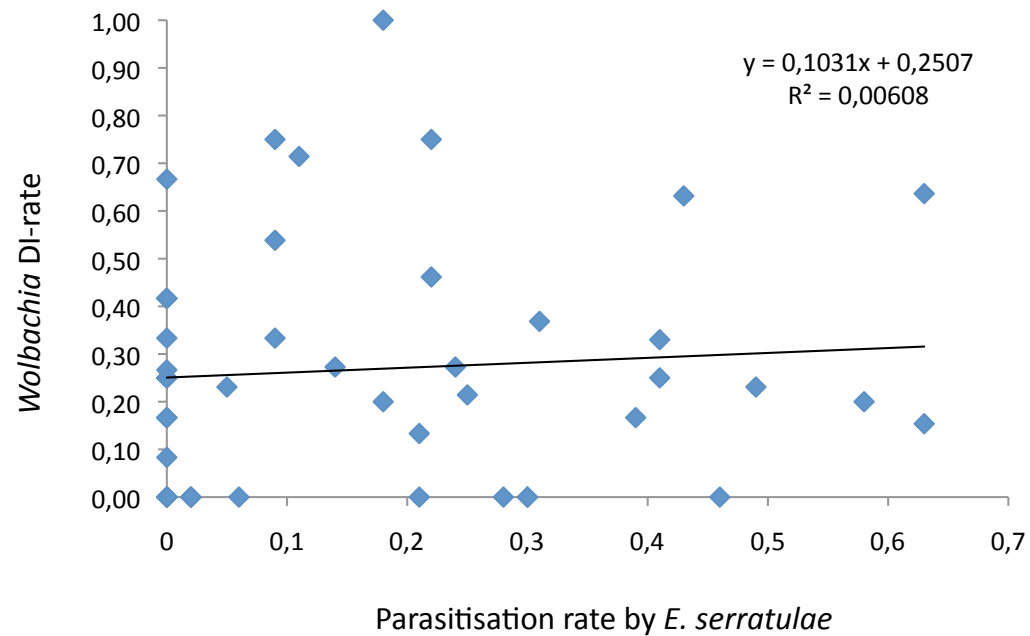

Supplement: ECE3-7-986-s005.pdf [file ECE3-7-986-s005.pdf]
